# Supplementary material for: Altering heating area assisted space confined method for growth of large scale and high quality MAPbBr3 single crystal thin films
Source: Royal Society of Chemistry journal article supplement (doi:10.1039/d2tc02301f), 2022-01-01
Supplement: d2tc02301f2.pdf [file d2tc02301f2.pdf]

## **Supporting Information**

### **Altering Heating Area Assisted Space Confined Method for Growth of Large Scale and High Quality MAPbBr<sub>3</sub> Single Crystal Thin Film**

*Changqian Li, Feitong Chen, Kaiyu Wang, Qing Yao, Jie Zhang, Qiqi Zhao, Qi Huang, Huiling Zhu, Jianxu Ding\**

College of Materials Science and Engineering, Shandong University of Science and Technology, Qingdao 266590, China.

#### **Corresponding author:**

**Jianxu Ding**- *College of Materials Science and Engineering, Shandong University of Science and Technology, Qingdao 266590, China; Email: [dingjianxu@sdust.edu.cn](mailto:dingjianxu@sdust.edu.cn)*

## 1. Growth of MAPbBr<sub>3</sub> SCFs with and without saturated solvent vapor

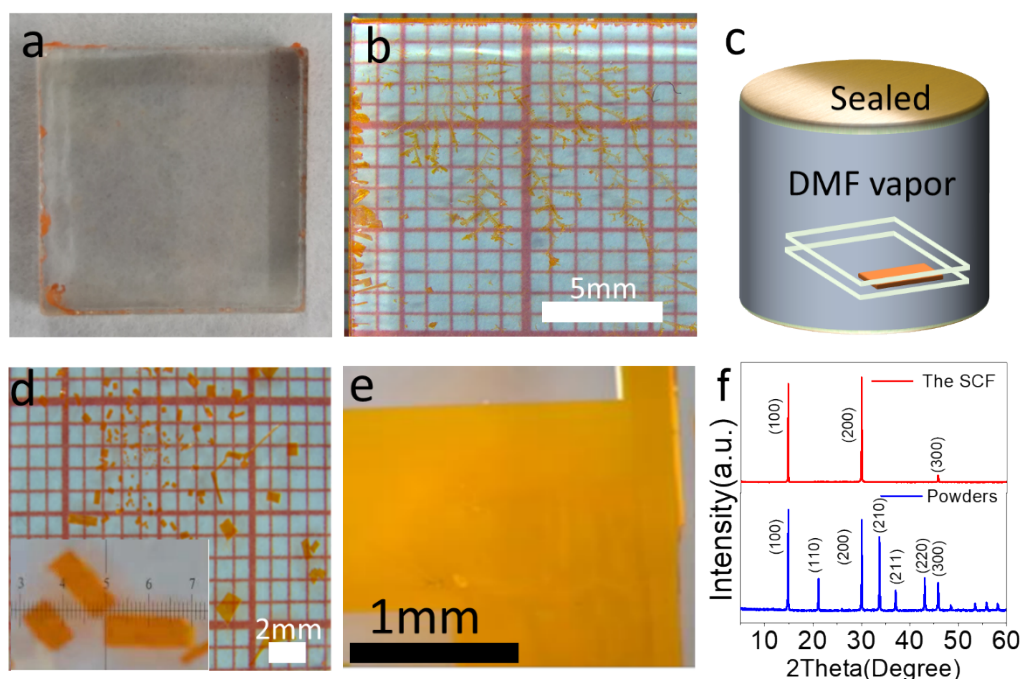

**Figure S1. (a-b) Photos of SCFs grown by the space-confined method under 80 °C and continuous rising temperature from 40 °C to 80 °C; (c) Schematic diagram of saturated solvent vapor assisted method; (d-e) Photos of SCFs grown by saturated solvent vapor assisted method; (f) The XRD patterns of the SCF and powders.**

Two square glass sheets with side length of 20 mm were used as substrates. The glass sheets were cleaned with deionized water, ethanol and isopropyl alcohol by ultrasonic wave successively, each cleaning time was 10 min. Then the glass sheets were dried at 60 °C. Equal molar ratio of PbBr<sub>2</sub> and MABr were dissolved in DMF to obtain 1 M transparent precursor solution. Drop precursor solution (20  $\mu$ l) onto one glass sheet and cover the other glass sheet. Place the laminated glass sheets in a closed container containing DMF (5 ml). Put the closed container in an environment of 40°C, then raise the temperature by 5° per hour to 80°C, and keep the temperature at the end for 10 h. Finally, the large area of MAPbBr<sub>3</sub> SCFs can be obtained.



## 2. Continuous feeding under constant heating area to grow MAPbBr<sub>3</sub> SCFs

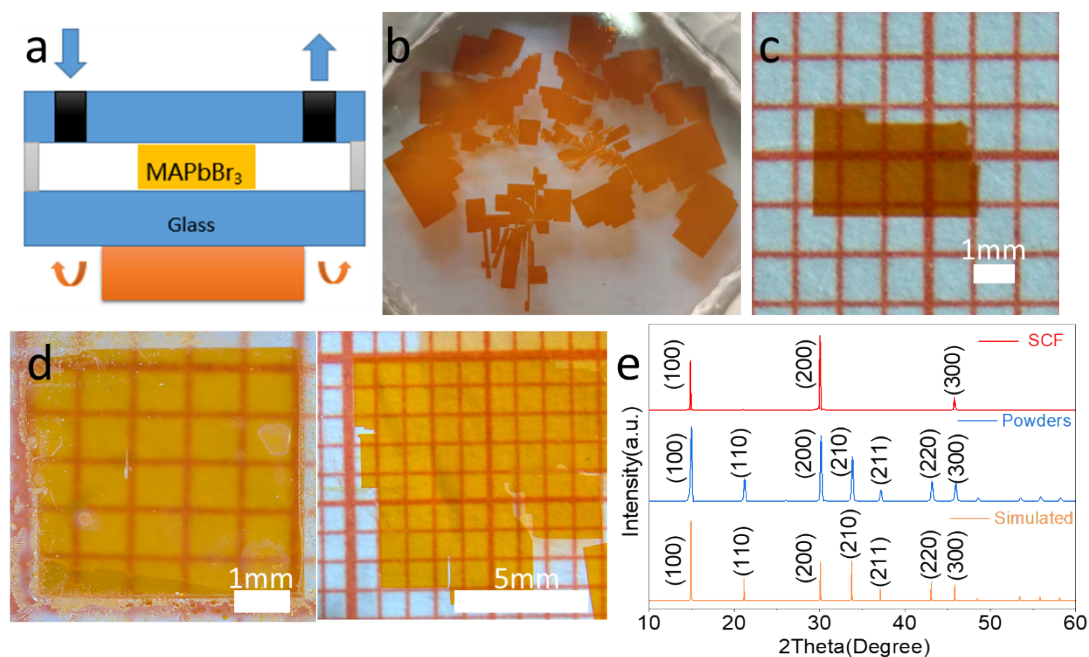

**Figure S2. (a) Schematic diagram of the device for growing SCFs using spatial confinement combined with continuous feeding; (b-d) The continuous feeding impels a large number of nucleation simultaneously, and the size of wafers can reach over 3-10 mm after growing for 15 h; (e) The XRD patterns of the MAPbBr<sub>3</sub> SCF and the MAPbBr<sub>3</sub> crystal powders.**

### 3. Subsequent growth process of MAPbBr<sub>3</sub> SCF

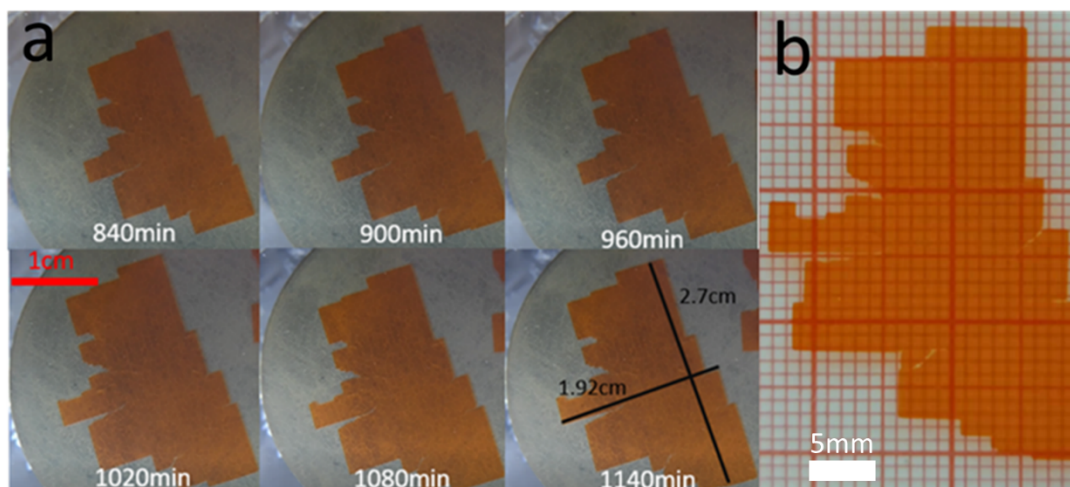

**Figure S3. (a) The other glimpse pictures growing for other times; (b) The final area and depth of MAPbBr<sub>3</sub> SCF are  $\sim 4.6 \text{ cm}^2$  and  $17.12 \text{ um}$ .**

#### 4. SEM image and element distributions of the MAPbBr<sub>3</sub> SCF

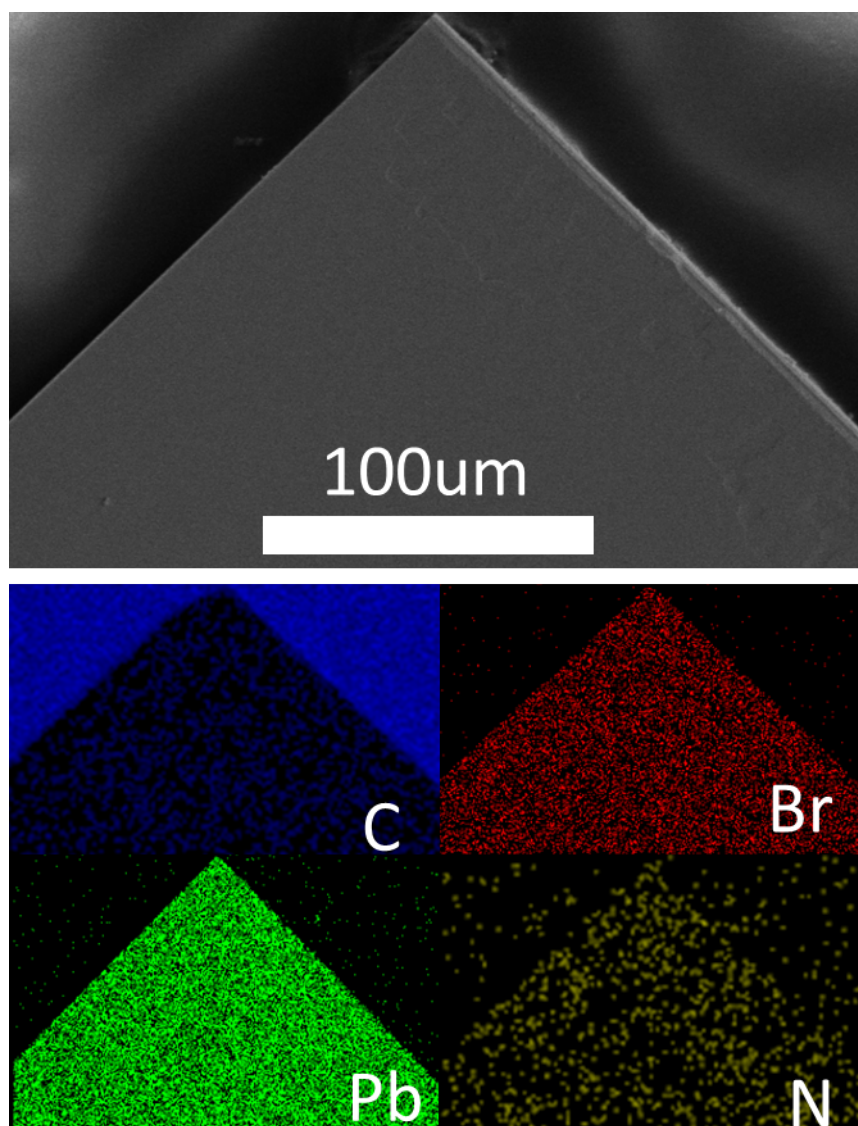

**Figure S4. The SEM image and element distributions of the MAPbBr<sub>3</sub> SCF, and these exhibit the smooth surface and homogenous elemental distributions.**

## 5. The decay times of MAPbBr<sub>3</sub> SCF and BSC

**Table S1. Comparison of PL decay process of MAPbBr<sub>3</sub> SCF and BSC.**

|                          | MAPbBr <sub>3</sub> SCF | MAPbBr <sub>3</sub> BSC |
|--------------------------|-------------------------|-------------------------|
| $\tau_1$ (percentage, %) | 6.97 ns (53.9)          | 2.61 ns (36.4)          |
| $\tau_2$ (percentage, %) | 37.4 ns (46.1)          | 10.6 ns (63.6)          |
| $\tau_a$                 | 21.0 ns                 | 7.7 ns                  |

## 6. Electronic structure of MAPbBr<sub>3</sub> SCF

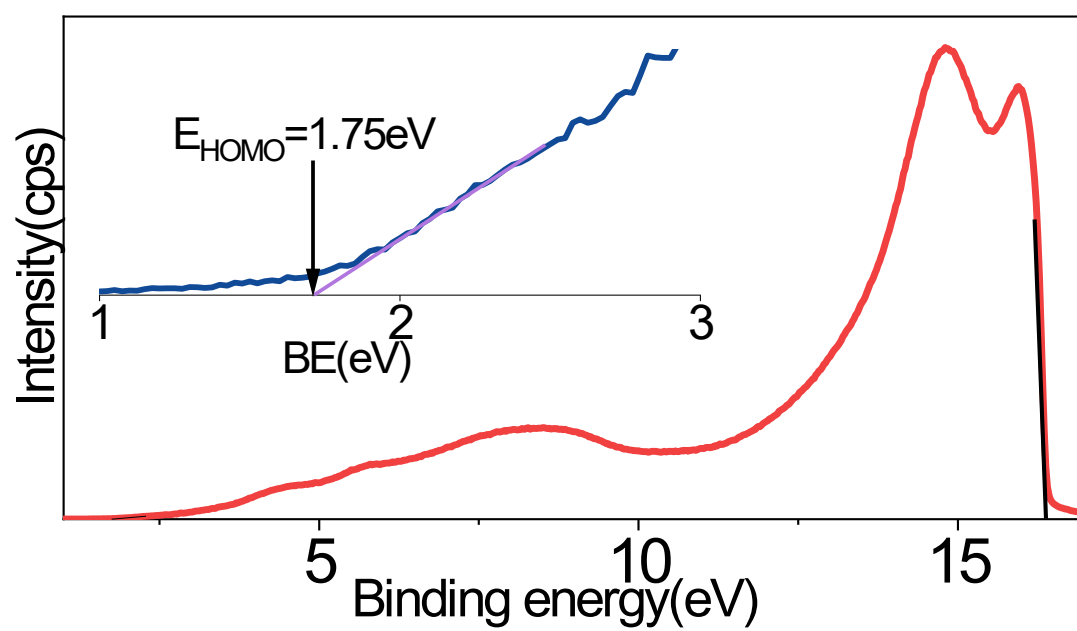

Figure S5. UPS spectra of MAPbBr<sub>3</sub> SCF.

## 7. Comparison of dark currents of MAPbBr<sub>3</sub> SCF and BSC photo-detectors

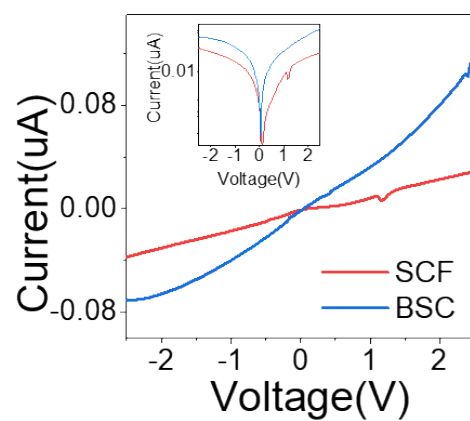

Figure S6. The dark currents for MAPbBr<sub>3</sub> SCF and BSC photo-detectors.

## 8. Synthesis of MABr

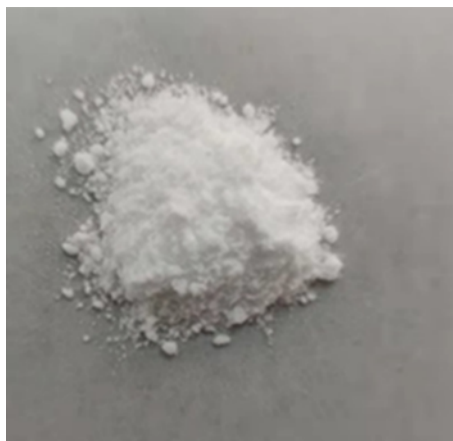

**Figure S7. Picture of as synthesis of MABr powder.**

A slightly excess molar stoichiometric proportion of  $\text{CH}_3\text{NH}_2$  was mixed in  $\text{HBr}$  solution under an ice bath in an ambient atmosphere under stirring for over 6 h. The mixed solution was sealed and heated at  $60\text{ }^\circ\text{C}$  for 24 hours. With the progress of the reaction, the excess solvent volatilized to obtain white  $\text{CH}_3\text{NH}_3\text{Br}$  (MABr).

## 9. Growth of MAPbBr<sub>3</sub> BSCs

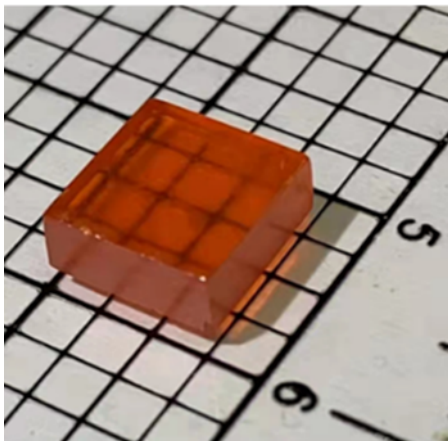

**Figure S8. Picture of MAPbBr<sub>3</sub> BSC.**

The precursor solution (1M with equal molar MABr and PbBr<sub>2</sub> in DMF) was placed in a constant temperature environment of 80 °C and MAPbBr<sub>3</sub> BSC was obtained after 24 h.
